# Supplementary material for: Analysis of 5’ gene regions reveals extraordinary conservation of novel non-coding sequences in a wide range of animals
Source: BMC Evol Biol. 2015 Oct 19;15:227. doi: 10.1186/s12862-015-0499-6 (PMC4613772; doi:10.1186/s12862-015-0499-6)
Supplement: Additional file 2: — Supplementary tables Table S1. Full list of overrepresented GO terms (q < 0.01) for the set of 322 true CNEs (hypergeometric test). Table S2. Full list of overrepresented GO terms (q < 0.01) for the set of 359 pseudo CNEs (hypergeometric test). Table S3. Full list of overrepresented GO terms (q < 0.01) for the set of 20 ancient CNEs (hypergeometric test). Table S4. Full list of 322 detected CNEs. Table S5. Homeobox-domain containing genes with detected CNEs. Table S6. RBH orthologs found by species analysed. Table S7. BLASTX filtering of CNE sets. Table S8. Significant (E < 0.001) results of a BLASTN search for the onsensus Not1 CNE in 100 bp upstream regions of the Not1 translation start site. Table S9. Genes and organisms used in the Not1 CNE analysis. Table S10. Abbreviations used in Figure 6 and Figure 7. (XLSX 73 kb) [file 12862_2015_499_MOESM2_ESM.xlsx]

## Sheet: Table S1
GO-ID	p-value	corr p-value	x	n	X	N	Description
10468	1.01e-34	2.67e-31	87	1299	237	15618	regulation of gene expression
60255	5.11e-34	6.73e-31	93	1531	237	15618	regulation of macromolecule metabolic process
2000112	6.75e-33	4.78e-30	79	1114	237	15618	regulation of cellular macromolecule biosynthetic process
31323	7.26e-33	4.78e-30	92	1547	237	15618	regulation of cellular metabolic process
80090	1.11e-32	5.86e-30	91	1520	237	15618	regulation of primary metabolic process
10556	1.52e-32	6.66e-30	79	1127	237	15618	regulation of macromolecule biosynthetic process
32502	2.33e-32	8.76e-30	122	2787	237	15618	developmental process
31326	1.61e-31	4.99e-29	79	1166	237	15618	regulation of cellular biosynthetic process
9889	1.92e-31	4.99e-29	79	1169	237	15618	regulation of biosynthetic process
51252	1.94e-31	4.99e-29	77	1106	237	15618	regulation of RNA metabolic process
7275	2.08e-31	4.99e-29	114	2492	237	15618	multicellular organismal development
19222	3.39e-31	7.44e-29	99	1888	237	15618	regulation of metabolic process
19219	1.58e-30	3.2e-28	80	1238	237	15618	regulation of nucleobase-containing compound metabolic process
51171	2.19e-30	3.68e-28	81	1277	237	15618	regulation of nitrogen compound metabolic process
1071	2.24e-30	3.68e-28	52	468	237	15618	nucleic acid binding transcription factor activity
3700	2.24e-30	3.68e-28	52	468	237	15618	sequence-specific DNA binding transcription factor activity
6355	1.17e-29	1.82e-27	72	1018	237	15618	regulation of transcription, DNA-dependent
2001141	2.96e-29	4.33e-27	72	1033	237	15618	regulation of RNA biosynthetic process
44707	3.13e-29	4.34e-27	124	3093	237	15618	single-multicellular organism process
44767	7.08e-29	9.33e-27	99	2015	237	15618	single-organism developmental process
48731	1.13e-28	1.36e-26	101	2108	237	15618	system development
48856	1.13e-28	1.36e-26	110	2490	237	15618	anatomical structure development
32501	4.7e-28	5.39e-26	126	3277	237	15618	multicellular organismal process
65007	1.23e-27	1.35e-25	136	3818	237	15618	biological regulation
50789	8.61e-27	9.08e-25	129	3526	237	15618	regulation of biological process
50794	7.64e-26	7.74e-24	122	3252	237	15618	regulation of cellular process
9653	1.63e-24	1.59e-22	77	1410	237	15618	anatomical structure morphogenesis
6357	1e-23	9.41e-22	45	465	237	15618	regulation of transcription from RNA polymerase II promoter
48513	2.57e-23	2.33e-21	73	1327	237	15618	organ development
5623	1.59e-22	1.35e-20	166	6082	237	15618	cell
44464	1.59e-22	1.35e-20	166	6082	237	15618	cell part
43565	5.87e-22	4.83e-20	37	326	237	15618	sequence-specific DNA binding
44699	1.42e-21	1.13e-19	158	5678	237	15618	single-organism process
9887	5.7e-20	4.42e-18	50	719	237	15618	organ morphogenesis
10605	1.06e-19	7.98e-18	40	452	237	15618	negative regulation of macromolecule metabolic process
5575	1.26e-19	9.19e-18	193	8364	237	15618	cellular_component
30154	1.34e-19	9.56e-18	79	1776	237	15618	cell differentiation
48869	2.36e-19	1.64e-17	80	1834	237	15618	cellular developmental process
5622	3.99e-19	2.69e-17	151	5527	237	15618	intracellular
10629	4.39e-19	2.89e-17	35	348	237	15618	negative regulation of gene expression
9892	5.02e-19	3.23e-17	40	472	237	15618	negative regulation of metabolic process
9886	6.16e-19	3.87e-17	41	501	237	15618	post-embryonic morphogenesis
7552	1.18e-18	7.21e-17	41	510	237	15618	metamorphosis
2165	1.28e-18	7.64e-17	43	566	237	15618	instar larval or pupal development
48707	2.2e-18	1.29e-16	40	492	237	15618	instar larval or pupal morphogenesis
9791	5.68e-18	3.25e-16	44	618	237	15618	post-embryonic development
7399	7.06e-18	3.96e-16	66	1371	237	15618	nervous system development
44424	7.48e-18	4.11e-16	140	5014	237	15618	intracellular part
5634	1.3e-17	6.99e-16	89	2360	237	15618	nucleus
7444	1.52e-17	8.03e-16	43	605	237	15618	imaginal disc development
48519	1.71e-17	8.81e-16	57	1061	237	15618	negative regulation of biological process
10557	2.34e-17	1.18e-15	32	322	237	15618	positive regulation of macromolecule biosynthetic process
31328	4.89e-17	2.43e-15	33	354	237	15618	positive regulation of cellular biosynthetic process
9891	5.32e-17	2.6e-15	33	355	237	15618	positive regulation of biosynthetic process
3677	7.4e-17	3.54e-15	62	1281	237	15618	DNA binding
6351	1.17e-16	5.49e-15	36	441	237	15618	transcription, DNA-dependent
32774	1.67e-16	7.72e-15	36	446	237	15618	RNA biosynthetic process
34654	1.76e-16	8e-15	41	587	237	15618	nucleobase-containing compound biosynthetic process
7417	2.24e-16	9.99e-15	29	278	237	15618	central nervous system development
48563	2.47e-16	1.07e-14	35	425	237	15618	post-embryonic organ morphogenesis
7560	2.47e-16	1.07e-14	35	425	237	15618	imaginal disc morphogenesis
1901362	3.84e-16	1.63e-14	44	692	237	15618	organic cyclic compound biosynthetic process
45893	4.36e-16	1.82e-14	29	285	237	15618	positive regulation of transcription, DNA-dependent
19438	7.33e-16	3.02e-14	42	642	237	15618	aromatic compound biosynthetic process
10628	8.34e-16	3.38e-14	29	292	237	15618	positive regulation of gene expression
43229	1.84e-15	7.33e-14	121	4209	237	15618	intracellular organelle
48569	1.88e-15	7.38e-14	35	454	237	15618	post-embryonic organ development
51254	2.04e-15	7.9e-14	29	302	237	15618	positive regulation of RNA metabolic process
43226	2.31e-15	8.82e-14	121	4221	237	15618	organelle
35107	2.43e-15	9.14e-14	32	378	237	15618	appendage morphogenesis
44271	2.65e-15	9.85e-14	42	666	237	15618	cellular nitrogen compound biosynthetic process
48736	3.8e-15	1.39e-13	32	384	237	15618	appendage development
35120	3.98e-15	1.44e-13	31	359	237	15618	post-embryonic appendage morphogenesis
45935	5.7e-15	2.03e-13	29	314	237	15618	positive regulation of nucleobase-containing compound metabolic process
2000113	7.94e-15	2.79e-13	28	294	237	15618	negative regulation of cellular macromolecule biosynthetic process
51173	8.13e-15	2.79e-13	30	343	237	15618	positive regulation of nitrogen compound metabolic process
48518	8.16e-15	2.79e-13	47	854	237	15618	positive regulation of biological process
35114	8.5e-15	2.87e-13	31	369	237	15618	imaginal disc-derived appendage morphogenesis
18130	9.46e-15	3.16e-13	41	659	237	15618	heterocycle biosynthetic process
10558	1.03e-14	3.38e-13	28	297	237	15618	negative regulation of macromolecule biosynthetic process
48737	1.14e-14	3.71e-13	31	373	237	15618	imaginal disc-derived appendage development
10467	1.31e-14	4.21e-13	57	1232	237	15618	gene expression
31327	1.44e-14	4.58e-13	28	301	237	15618	negative regulation of cellular biosynthetic process
9890	1.57e-14	4.92e-13	28	302	237	15618	negative regulation of biosynthetic process
31325	1.71e-14	5.29e-13	34	460	237	15618	positive regulation of cellular metabolic process
48523	2.23e-14	6.82e-13	49	948	237	15618	negative regulation of cellular process
31324	2.91e-14	8.82e-13	31	386	237	15618	negative regulation of cellular metabolic process
35220	3.2e-14	9.58e-13	34	470	237	15618	wing disc development
9893	3.4e-14	1.01e-12	34	471	237	15618	positive regulation of metabolic process
45944	5.66e-14	1.66e-12	23	203	237	15618	positive regulation of transcription from RNA polymerase II promoter
10604	6.51e-14	1.89e-12	32	425	237	15618	positive regulation of macromolecule metabolic process
981	1.35e-13	3.86e-12	20	151	237	15618	sequence-specific DNA binding RNA polymerase II transcription factor activity
43231	1.36e-13	3.86e-12	106	3615	237	15618	intracellular membrane-bounded organelle
43227	1.47e-13	4.12e-12	106	3619	237	15618	membrane-bounded organelle
16070	1.7e-13	4.7e-12	49	1000	237	15618	RNA metabolic process
45165	1.73e-13	4.75e-12	33	469	237	15618	cell fate commitment
44763	1.82e-13	4.95e-12	131	5046	237	15618	single-organism cellular process
45892	1.92e-13	5.16e-12	25	260	237	15618	negative regulation of transcription, DNA-dependent
48522	3.58e-13	9.53e-12	42	769	237	15618	positive regulation of cellular process
51253	4.16e-13	1.09e-11	25	269	237	15618	negative regulation of RNA metabolic process
976	7.62e-13	1.99e-11	15	79	237	15618	transcription regulatory region sequence-specific DNA binding
22008	1.22e-12	3.15e-11	53	1210	237	15618	neurogenesis
45934	1.41e-12	3.6e-11	25	284	237	15618	negative regulation of nucleobase-containing compound metabolic process
51172	1.65e-12	4.17e-11	25	286	237	15618	negative regulation of nitrogen compound metabolic process
48699	1.99e-12	4.98e-11	39	706	237	15618	generation of neurons
7420	2.92e-12	7.27e-11	19	157	237	15618	brain development
48468	3.53e-12	8.69e-11	46	971	237	15618	cell development
3002	5.42e-12	1.32e-10	31	470	237	15618	regionalization
975	7.02e-12	1.68e-10	16	108	237	15618	regulatory region DNA binding
1067	7.02e-12	1.68e-10	16	108	237	15618	regulatory region nucleic acid binding
7389	1.05e-11	2.48e-10	32	513	237	15618	pattern specification process
7472	1.07e-11	2.51e-10	26	338	237	15618	wing disc morphogenesis
7476	4.06e-11	9.46e-10	25	331	237	15618	imaginal disc-derived wing morphogenesis
44212	6.37e-11	1.47e-09	15	106	237	15618	transcription regulatory region DNA binding
122	1.1e-10	2.51e-09	17	149	237	15618	negative regulation of transcription from RNA polymerase II promoter
6366	1.21e-10	2.75e-09	22	267	237	15618	transcription from RNA polymerase II promoter
22414	2.86e-10	6.44e-09	39	833	237	15618	reproductive process
30182	3.32e-10	7.41e-09	33	621	237	15618	neuron differentiation
1708	1.15e-09	2.54e-08	11	59	237	15618	cell fate specification
9888	1.83e-09	4.02e-08	35	737	237	15618	tissue development
3	3.2e-09	6.96e-08	41	986	237	15618	reproduction
980	4.68e-09	1.01e-07	7	18	237	15618	RNA polymerase II distal enhancer sequence-specific DNA binding
35326	7.32e-09	1.55e-07	7	19	237	15618	enhancer binding
1158	7.32e-09	1.55e-07	7	19	237	15618	enhancer sequence-specific DNA binding
32989	8.08e-09	1.7e-07	31	632	237	15618	cellular component morphogenesis
982	1.24e-08	2.59e-07	10	57	237	15618	RNA polymerase II core promoter proximal region sequence-specific DNA binding transcription factor activity
50793	1.39e-08	2.89e-07	29	575	237	15618	regulation of developmental process
5515	1.54e-08	3.15e-07	90	3440	237	15618	protein binding
7423	1.54e-08	3.15e-07	27	508	237	15618	sensory organ development
48646	2.07e-08	4.19e-07	26	481	237	15618	anatomical structure formation involved in morphogenesis
904	2.2e-08	4.43e-07	25	449	237	15618	cell morphogenesis involved in differentiation
51239	2.45e-08	4.89e-07	29	590	237	15618	regulation of multicellular organismal process
50896	2.48e-08	4.91e-07	76	2722	237	15618	response to stimulus
40011	3.04e-08	5.97e-07	28	560	237	15618	locomotion
9790	5.82e-08	1.14e-06	29	614	237	15618	embryo development
977	6.41e-08	1.24e-06	9	51	237	15618	RNA polymerase II regulatory region sequence-specific DNA binding
1709	6.74e-08	1.3e-06	14	150	237	15618	cell fate determination
1012	7.64e-08	1.45e-06	9	52	237	15618	RNA polymerase II regulatory region DNA binding
3006	7.66e-08	1.45e-06	27	549	237	15618	developmental process involved in reproduction
14016	8.25e-08	1.55e-06	8	38	237	15618	neuroblast differentiation
48812	9.07e-08	1.7e-06	23	415	237	15618	neuron projection morphogenesis
48666	9.46e-08	1.75e-06	26	519	237	15618	neuron development
902	9.55e-08	1.76e-06	27	555	237	15618	cell morphogenesis
48667	1.03e-07	1.89e-06	23	418	237	15618	cell morphogenesis involved in neuron differentiation
30030	1.33e-07	2.41e-06	26	528	237	15618	cell projection organization
31175	1.45e-07	2.62e-06	23	426	237	15618	neuron projection development
7400	1.53e-07	2.74e-06	7	28	237	15618	neuroblast fate determination
1078	1.83e-07	3.23e-06	6	18	237	15618	RNA polymerase II core promoter proximal region sequence-specific DNA binding transcription factor activity involved in negative regulation of transcription
1227	1.83e-07	3.23e-06	6	18	237	15618	RNA polymerase II transcription regulatory region sequence-specific DNA binding transcription factor activity involved in negative regulation of transcription
51093	1.84e-07	3.24e-06	16	215	237	15618	negative regulation of developmental process
7610	1.99e-07	3.46e-06	24	468	237	15618	behavior
48609	2.06e-07	3.57e-06	31	729	237	15618	multicellular organismal reproductive process
60581	2.56e-07	4.41e-06	7	30	237	15618	cell fate commitment involved in pattern specification
1654	2.73e-07	4.67e-06	21	374	237	15618	eye development
48863	2.96e-07	5.02e-06	13	144	237	15618	stem cell differentiation
14017	3.27e-07	5.52e-06	7	31	237	15618	neuroblast fate commitment
61061	3.47e-07	5.83e-06	18	284	237	15618	muscle structure development
32504	4.39e-07	7.32e-06	32	795	237	15618	multicellular organism reproduction
48867	5.18e-07	8.58e-06	7	33	237	15618	stem cell fate determination
48858	6.07e-07	1e-05	23	462	237	15618	cell projection morphogenesis
32990	6.31e-07	1.03e-05	23	463	237	15618	cell part morphogenesis
48592	6.37e-07	1.04e-05	18	296	237	15618	eye morphogenesis
35218	7.71e-07	1.25e-05	10	87	237	15618	leg disc development
9605	9.81e-07	1.58e-05	23	475	237	15618	response to external stimulus
7424	1.02e-06	1.63e-05	15	215	237	15618	open tracheal system development
48806	1.18e-06	1.87e-05	7	37	237	15618	genitalia development
48865	1.18e-06	1.87e-05	7	37	237	15618	stem cell fate commitment
35282	1.26e-06	1.97e-05	16	248	237	15618	segmentation
44702	1.42e-06	2.21e-05	29	716	237	15618	single organism reproductive process
10608	1.97e-06	3.05e-05	13	170	237	15618	posttranscriptional regulation of gene expression
60541	2.38e-06	3.66e-05	15	230	237	15618	respiratory system development
46530	2.4e-06	3.67e-05	13	173	237	15618	photoreceptor cell differentiation
1745	2.7e-06	4.12e-05	16	263	237	15618	compound eye morphogenesis
16043	2.79e-06	4.23e-05	61	2250	237	15618	cellular component organization
1751	2.87e-06	4.31e-05	12	149	237	15618	compound eye photoreceptor cell differentiation
48859	2.91e-06	4.36e-05	7	42	237	15618	formation of anatomical boundary
70491	2.94e-06	4.37e-05	5	16	237	15618	repressing transcription factor binding
48813	3.07e-06	4.55e-05	12	150	237	15618	dendrite morphogenesis
42330	3.43e-06	5.04e-05	18	333	237	15618	taxis
16358	3.78e-06	5.53e-05	12	153	237	15618	dendrite development
7276	3.91e-06	5.7e-05	27	672	237	15618	gamete generation
1754	4.94e-06	7.15e-05	12	157	237	15618	eye photoreceptor cell differentiation
8134	5.78e-06	8.32e-05	11	133	237	15618	transcription factor binding
19953	6.2e-06	8.87e-05	27	689	237	15618	sexual reproduction
48749	6.32e-06	8.99e-05	17	314	237	15618	compound eye development
40007	6.74e-06	9.54e-05	13	190	237	15618	growth
71840	6.86e-06	9.65e-05	61	2313	237	15618	cellular component organization or biogenesis
9880	6.89e-06	9.65e-05	14	220	237	15618	embryonic pattern specification
7447	7.23e-06	0.000101	10	111	237	15618	imaginal disc pattern formation
35215	7.35e-06	0.000101	7	48	237	15618	genital disc development
48645	7.35e-06	0.000101	7	48	237	15618	organ formation
42659	7.46e-06	0.000102	6	32	237	15618	regulation of cell fate specification
35290	7.54e-06	0.000103	5	19	237	15618	trunk segmentation
7409	8.11e-06	0.00011	17	320	237	15618	axonogenesis
10453	9.01e-06	0.000122	6	33	237	15618	regulation of cell fate commitment
44708	9.15e-06	0.000123	19	393	237	15618	single-organism behavior
7350	9.44e-06	0.000126	13	196	237	15618	blastoderm segmentation
61564	9.93e-06	0.000132	17	325	237	15618	axon development
35127	1.05e-05	0.000138	8	70	237	15618	post-embryonic limb morphogenesis
7480	1.05e-05	0.000138	8	70	237	15618	imaginal disc-derived leg morphogenesis
2000026	1.09e-05	0.000143	19	398	237	15618	regulation of multicellular organismal development
7478	1.17e-05	0.000152	8	71	237	15618	leg disc morphogenesis
7548	1.25e-05	0.000162	10	118	237	15618	sex differentiation
45596	1.26e-05	0.000162	12	172	237	15618	negative regulation of cell differentiation
7154	1.5e-05	0.000192	50	1800	237	15618	cell communication
35108	1.59e-05	0.000203	8	74	237	15618	limb morphogenesis
48729	1.62e-05	0.000206	18	373	237	15618	tissue morphogenesis
60173	1.76e-05	0.000222	8	75	237	15618	limb development
16319	2.09e-05	0.000263	7	56	237	15618	mushroom body development
42221	2.51e-05	0.000315	32	965	237	15618	response to chemical stimulus
44700	3.02e-05	0.000377	48	1746	237	15618	single organism signaling
23052	3.3e-05	0.00041	48	1752	237	15618	signaling
40034	3.32e-05	0.00041	4	13	237	15618	regulation of development, heterochronic
60429	3.79e-05	0.000466	20	474	237	15618	epithelium development
3730	3.91e-05	0.000479	5	26	237	15618	mRNA 3'-UTR binding
6928	4.53e-05	0.000553	23	601	237	15618	cellular component movement
5700	5.16e-05	0.000627	10	139	237	15618	polytene chromosome
48477	5.69e-05	0.000687	20	488	237	15618	oogenesis
45595	5.92e-05	0.000712	17	374	237	15618	regulation of cell differentiation
35214	6.17e-05	0.000738	7	66	237	15618	eye-antennal disc development
7411	6.2e-05	0.000739	14	268	237	15618	axon guidance
7484	6.8e-05	0.000807	5	29	237	15618	imaginal disc-derived genitalia development
48565	7.3e-05	0.000859	9	117	237	15618	digestive tract development
55123	7.3e-05	0.000859	9	117	237	15618	digestive system development
48589	7.82e-05	0.000915	10	146	237	15618	developmental growth
7292	8.38e-05	0.000977	20	502	237	15618	female gamete generation
22412	8.62e-05	0.001	20	503	237	15618	cellular process involved in reproduction in multicellular organism
97485	8.83e-05	0.00102	14	277	237	15618	neuron projection guidance
7517	9.31e-05	0.00107	13	244	237	15618	muscle organ development
7166	9.47e-05	0.00108	23	631	237	15618	cell surface receptor signaling pathway
48102	9.88e-05	0.00112	7	71	237	15618	autophagic cell death
35071	9.88e-05	0.00112	7	71	237	15618	salivary gland cell autophagic cell death
7498	0.000105	0.00119	8	96	237	15618	mesoderm development
30540	0.000115	0.00129	3	7	237	15618	female genitalia development
7486	0.000115	0.00129	3	7	237	15618	imaginal disc-derived female genitalia development
6935	0.000143	0.0016	14	290	237	15618	chemotaxis
5829	0.000149	0.00165	16	365	237	15618	cytosol
10160	0.00015	0.00166	5	34	237	15618	formation of organ boundary
5737	0.000158	0.00174	65	2788	237	15618	cytoplasm
7422	0.000172	0.00186	8	103	237	15618	peripheral nervous system development
6414	0.000173	0.00186	5	35	237	15618	translational elongation
16246	0.000173	0.00186	5	35	237	15618	RNA interference
7419	0.000173	0.00186	5	35	237	15618	ventral cord development
7379	0.000173	0.00186	5	35	237	15618	segment specification
35070	0.000179	0.00193	7	78	237	15618	salivary gland histolysis
7487	0.000183	0.00196	3	8	237	15618	analia development
9952	0.000188	0.002	11	194	237	15618	anterior/posterior pattern specification
44422	0.000197	0.00209	58	2421	237	15618	organelle part
48870	0.000219	0.00232	13	266	237	15618	cell motility
48608	0.000224	0.00235	8	107	237	15618	reproductive structure development
61458	0.000224	0.00235	8	107	237	15618	reproductive system development
4398	0.000229	0.00238	2	2	237	15618	histidine decarboxylase activity
4099	0.000229	0.00238	2	2	237	15618	chitin deacetylase activity
7540	0.000229	0.00238	2	2	237	15618	sex determination, establishment of X:A ratio
7626	0.000237	0.00245	10	167	237	15618	locomotory behavior
7622	0.00024	0.00247	6	58	237	15618	rhythmic behavior
48070	0.000253	0.00258	4	21	237	15618	regulation of developmental pigmentation
7530	0.000253	0.00258	4	21	237	15618	sex determination
51674	0.000253	0.00258	13	270	237	15618	localization of cell
44446	0.000259	0.00262	57	2391	237	15618	intracellular organelle part
35221	0.000271	0.00271	3	9	237	15618	genital disc pattern formation
35224	0.000271	0.00271	3	9	237	15618	genital disc anterior/posterior pattern formation
21675	0.000271	0.00271	3	9	237	15618	nerve development
16271	0.000285	0.00283	7	84	237	15618	tissue death
7559	0.000285	0.00283	7	84	237	15618	histolysis
40029	0.000287	0.00284	9	140	237	15618	regulation of gene expression, epigenetic
2009	0.000323	0.00319	15	352	237	15618	morphogenesis of an epithelium
48598	0.00036	0.00353	13	280	237	15618	embryonic morphogenesis
16477	0.00036	0.00353	12	244	237	15618	cell migration
46983	0.000364	0.00355	15	356	237	15618	protein dimerization activity
5811	0.00038	0.0037	14	319	237	15618	lipid particle
19213	0.000383	0.00371	3	10	237	15618	deacetylase activity
51241	0.000412	0.00398	6	64	237	15618	negative regulation of multicellular organismal process
1077	0.000415	0.00398	5	42	237	15618	RNA polymerase II core promoter proximal region sequence-specific DNA binding transcription factor activity involved in positive regulation of transcription
1228	0.000415	0.00398	5	42	237	15618	RNA polymerase II transcription regulatory region sequence-specific DNA binding transcription factor activity involved in positive regulation of transcription
9996	0.000433	0.00411	4	24	237	15618	negative regulation of cell fate specification
10454	0.000433	0.00411	4	24	237	15618	negative regulation of cell fate commitment
16769	0.000509	0.00479	4	25	237	15618	transferase activity, transferring nitrogenous groups
46660	0.000509	0.00479	4	25	237	15618	female sex differentiation
46545	0.000509	0.00479	4	25	237	15618	development of primary female sexual characteristics
44428	0.000514	0.00482	30	1039	237	15618	nuclear part
7501	0.00052	0.00484	3	11	237	15618	mesodermal cell fate specification
7488	0.00052	0.00484	3	11	237	15618	histoblast morphogenesis
60560	0.000528	0.0049	6	67	237	15618	developmental growth involved in morphogenesis
48610	0.000533	0.00492	21	622	237	15618	cellular process involved in reproduction
35295	0.000534	0.00492	10	185	237	15618	tube development
7431	0.00055	0.00505	9	153	237	15618	salivary gland development
7623	0.000572	0.00522	6	68	237	15618	circadian rhythm
35194	0.000575	0.00522	5	45	237	15618	posttranscriptional gene silencing by RNA
16441	0.000575	0.00522	5	45	237	15618	posttranscriptional gene silencing
7485	0.000594	0.00538	4	26	237	15618	imaginal disc-derived male genitalia development
30855	0.000658	0.00593	10	190	237	15618	epithelial cell differentiation
35272	0.000663	0.00596	9	157	237	15618	exocrine system development
21960	0.000681	0.00606	2	3	237	15618	anterior commissure morphogenesis
35054	0.000681	0.00606	2	3	237	15618	embryonic heart tube anterior/posterior pattern specification
7388	0.000681	0.00606	2	3	237	15618	posterior compartment specification
8586	0.000704	0.00624	5	47	237	15618	imaginal disc-derived wing vein morphogenesis
42692	0.000726	0.00642	9	159	237	15618	muscle cell differentiation
48732	0.000742	0.00654	10	193	237	15618	gland development
51301	0.000751	0.0066	12	265	237	15618	cell division
43234	0.000755	0.00661	46	1890	237	15618	protein complex
31047	0.000776	0.00677	5	48	237	15618	gene silencing by RNA
35309	0.000882	0.00759	3	13	237	15618	wing and notum subfield formation
35072	0.000882	0.00759	3	13	237	15618	ecdysone-mediated induction of salivary gland cell autophagic cell death
7430	0.000882	0.00759	3	13	237	15618	terminal branching, open tracheal system
18993	0.000882	0.00759	3	13	237	15618	somatic sex determination
8340	0.000916	0.00783	8	132	237	15618	determination of adult lifespan
10259	0.000916	0.00783	8	132	237	15618	multicellular organismal aging
3729	0.000986	0.0084	9	166	237	15618	mRNA binding
32268	0.000988	0.0084	13	312	237	15618	regulation of cellular protein metabolic process
48511	0.00103	0.00875	6	76	237	15618	rhythmic process
35159	0.00104	0.00877	4	30	237	15618	regulation of tube length, open tracheal system
22612	0.00106	0.00892	8	135	237	15618	gland morphogenesis
35078	0.00111	0.00928	3	14	237	15618	induction of programmed cell death by ecdysone
42693	0.00111	0.00928	3	14	237	15618	muscle cell fate commitment
7167	0.00112	0.00933	9	169	237	15618	enzyme linked receptor protein signaling pathway
7568	0.00117	0.00968	8	137	237	15618	aging
9954	0.00118	0.00973	4	31	237	15618	proximal/distal pattern formation
7469	0.00118	0.00973	4	31	237	15618	antennal development

## Sheet: Table S2
GO-ID	p-value	corr p-value	x	n	X	N	Description
44699	1.28e-09	2.6e-06	183	5678	309	13396	single-organism process
44763	6.81e-08	6.91e-05	162	5046	309	13396	single-organism cellular process
32502	1.46e-07	9.85e-05	103	2787	309	13396	developmental process
10467	5.55e-07	0.000282	56	1232	309	13396	gene expression
6396	1.78e-06	0.000656	28	449	309	13396	RNA processing
7275	1.94e-06	0.000656	91	2492	309	13396	multicellular organismal development
16071	2.29e-06	0.000664	24	353	309	13396	mRNA metabolic process
377	6.57e-06	0.00138	17	208	309	13396	RNA splicing, via transesterification reactions with bulged adenosine as nucleophile
398	6.57e-06	0.00138	17	208	309	13396	mRNA splicing, via spliceosome
71840	7.18e-06	0.00138	84	2313	309	13396	cellular component organization or biogenesis
375	7.47e-06	0.00138	17	210	309	13396	RNA splicing, via transesterification reactions
71822	1.03e-05	0.00167	29	520	309	13396	protein complex subunit organization
32501	1.1e-05	0.00167	109	3277	309	13396	multicellular organismal process
7049	1.23e-05	0.00167	37	757	309	13396	cell cycle
22402	1.23e-05	0.00167	34	668	309	13396	cell cycle process
16043	1.56e-05	0.0019	81	2250	309	13396	cellular component organization
6996	1.59e-05	0.0019	58	1442	309	13396	organelle organization
48869	1.99e-05	0.00221	69	1834	309	13396	cellular developmental process
8380	2.07e-05	0.00221	17	227	309	13396	RNA splicing
6397	3.01e-05	0.00305	20	307	309	13396	mRNA processing
51641	3.31e-05	0.0032	35	731	309	13396	cellular localization
46854	4.23e-05	0.0039	5	18	309	13396	phosphatidylinositol phosphorylation
16070	5.23e-05	0.00462	43	1000	309	13396	RNA metabolic process
44707	6.18e-05	0.00523	101	3093	309	13396	single-multicellular organism process
46834	7.37e-05	0.00598	5	20	309	13396	lipid phosphorylation
51649	7.71e-05	0.00602	30	610	309	13396	establishment of localization in cell
30154	8.58e-05	0.00645	65	1776	309	13396	cell differentiation
48856	0.000113	0.0082	84	2490	309	13396	anatomical structure development

## Sheet: Table S3
GO-ID	p-value	corr p-value	x	n	X	N	Description
10608	8.02e-07	0.000603	5	170	17	15618	posttranscriptional regulation of gene expression
65007	9.37e-06	0.00246	13	3818	17	15618	biological regulation
5622	1.03e-05	0.00246	15	5527	17	15618	intracellular
44444	1.31e-05	0.00246	10	2070	17	15618	cytoplasmic part
5575	2.43e-05	0.00267	17	8364	17	15618	cellular_component
5737	2.46e-05	0.00267	11	2788	17	15618	cytoplasm
44424	2.86e-05	0.00267	14	5014	17	15618	intracellular part
5829	3.33e-05	0.00267	5	365	17	15618	cytosol
50789	3.35e-05	0.00267	12	3526	17	15618	regulation of biological process
5623	3.91e-05	0.00267	15	6082	17	15618	cell
44464	3.91e-05	0.00267	15	6082	17	15618	cell part
5875	4.41e-05	0.00276	5	387	17	15618	microtubule associated complex
43228	7.06e-05	0.00379	8	1479	17	15618	non-membrane-bounded organelle
43232	7.06e-05	0.00379	8	1479	17	15618	intracellular non-membrane-bounded organelle
80090	8.59e-05	0.00425	8	1520	17	15618	regulation of primary metabolic process
60255	9.05e-05	0.00425	8	1531	17	15618	regulation of macromolecule metabolic process
31323	9.75e-05	0.00431	8	1547	17	15618	regulation of cellular metabolic process
50794	0.00011	0.00461	11	3252	17	15618	regulation of cellular process
6417	0.000123	0.0048	3	91	17	15618	regulation of translation
48731	0.000128	0.0048	9	2108	17	15618	system development
30529	0.00016	0.00572	5	508	17	15618	ribonucleoprotein complex
32502	0.000184	0.00629	10	2787	17	15618	developmental process
43229	0.000217	0.00673	12	4209	17	15618	intracellular organelle
43226	0.000223	0.00673	12	4221	17	15618	organelle
15630	0.000224	0.00673	5	546	17	15618	microtubule cytoskeleton
10468	0.00025	0.00722	7	1299	17	15618	regulation of gene expression
30154	0.000259	0.00722	8	1776	17	15618	cell differentiation
32268	0.000303	0.00813	4	312	17	15618	regulation of cellular protein metabolic process
48869	0.000325	0.00842	8	1834	17	15618	cellular developmental process
7399	0.000349	0.00866	7	1371	17	15618	nervous system development
3730	0.000357	0.00866	2	26	17	15618	mRNA 3'-UTR binding
19222	0.000398	0.00919	8	1888	17	15618	regulation of metabolic process
44430	0.000403	0.00919	5	620	17	15618	cytoskeletal part
32991	0.000428	0.00947	9	2461	17	15618	macromolecular complex
44707	0.00045	0.00958	10	3093	17	15618	single-multicellular organism process
48856	0.000469	0.00958	9	2490	17	15618	anatomical structure development
7275	0.000471	0.00958	9	2492	17	15618	multicellular organismal development
17148	0.000509	0.00994	2	31	17	15618	negative regulation of translation
51246	0.000515	0.00994	4	359	17	15618	regulation of protein metabolic process

## Sheet: Table S4
CNE ID	Name	Approximate age (Myr)	Σ conservation scores	Length (bp)	Distance from translation start site (bp)	GC content	ATG O/E	No. species	SCI empirical p-val
NV17921-1	RpLP2 (Ribosomal protein LP2)	> 700	0.33	73	335	0.33	0	23	0.062
NV13388-1	RpLP1 (Ribosomal protein LP1)	> 670	0.46	80	28	0.53	0	35	0.466
NV18106-1	Not1 (Not1)	> 500	4.81	77	1	0.53	0.75	13	0.001
NV20288-1	Glut4EF (Glucose transporter 4 enhancer factor)	350	0.97	87	1016	0.64	0	3	0.534
NV20214-1		350	0.06	53	373	0.55	0	3	0.675
NV16388-1		350	0.59	63	1680	0.3	1.88	2	0.128
NV16210-1	pAbp (polyA-binding protein)	350	1.41	145	624	0.44	0	4	0.767
NV12885-2	Dll (Distal-less)	350	3.13	126	1	0.71	0	6	0.987
NV16033-1	dbo (diablo)	350	1.9	87	65	0.6	0	6	0.418
NV15766-2	eIF5 (eIF5)	350	2.22	84	898	0.5	0.68	8	0.873
NV14758-1	eff (effete)	350	0.91	77	87	0.5	0	5	0.318
NV14524-1	Teh2 (tipE homolog 2)	350	1.14	137	803	0.49	0	5	0.002
NV14356-1	ran (ran)	350	0.06	60	1853	0.63	1.55	2	< 0.001
NV13011-1	Fer1HCH (Ferritin 1 heavy chain homologue)	350	0.74	69	124	0.49	0.86	4	0.005
NV12775-3	COQ7 (COQ7)	350	0.61	115	40	0.4	1.41	4	0.194
NV12441-1	CkIIbeta (Casein kinase II beta subunit)	350	0.18	58	1227	0.52	0	4	0.589
NV12233-1	CrebB-17A (Cyclic-AMP response element binding protein B at 17A)	350	1.86	96	557	0.51	0	4	0.912
NV17921-2	RpLP2 (Ribosomal protein LP2)	350	0.25	62	90	0.34	3.73	3	0.057
NV10220-2	Unr (Upstream of N-ras)	350	2.98	272	820	0.33	0.43	7	0.256
NV10220-1	Unr (Upstream of N-ras)	350	2.31	87	1912	0.53	2.36	4	0.131
NV31591-1		180	0.59	74	1251	0.65	0	2	0.387
NV31392-1		180	0.59	71	508	0.46	1.8	2	0.398
NV30984-1		180	0.43	77	146	0.69	0	4	0.642
NV30895-1		180	0.18	67	791	0.52	0.83	2	0.152
NV30580-1		180	0.27	55	1610	0.42	1.59	3	0.269
NV30571-1		180	0.94	118	115	0.23	0	2	0.818
NV30567-1		180	2.28	106	462	0.52	0	4	0.551
NV30566-1		180	0.09	55	993	0.76	0	3	0.273
NV25803-1	Tab2 (TAK1-associated binding protein 2)	180	0.76	72	1	0.61	2.06	2	0.729
NV25684-1		180	0.19	60	252	0.58	1.56	3	0.744
NV25655-1	CG15594	180	0.59	71	348	0.61	0	2	0.767
NV24468-1	CG7358	180	0.06	50	1	0.36	2.03	4	0.6
NV24459-1	brk (brinker)	180	0.16	58	1211	0.49	2.14	4	0.705
NV24456-1		180	0.09	52	47	0.4	1.12	3	0.609
NV24275-1	CG42240	180	0.24	72	724	0.57	2.22	2	0.112
NV23740-1		180	0.87	99	354	0.41	1.01	2	0.596
NV23733-1	cbt (cabut)	180	0.3	132	400	0.68	1.01	3	0.291
NV23723-1		180	0.87	72	219	0.68	2.23	3	0.55
NV23694-1		180	1.63	81	589	0.49	0.88	3	0.921
NV23686-1		180	0.41	73	92	0.47	1.75	2	0.581
NV23611-3		180	0.19	65	501	0.26	1.28	4	0.397
NV23611-2		180	1.57	90	670	0.42	3.2	4	0.02
NV23611-1		180	1.74	83	1780	0.41	2	3	0.92
NV23154-1		180	0.19	62	277	0.61	1.57	3	0.118
NV12808-1	CG2016	180	0.08	57	56	0.52	1.19	3	0.168
NV22730-1		180	0.13	79	292	0.53	0	3	0.027
NV22666-2		180	0.13	56	942	0.55	1.49	2	0.184
NV22666-1		180	0.13	69	1078	0.54	0	2	0.887
NV22500-1		180	0.37	56	193	0.43	0.85	3	0.406
NV22380-1	CG14309	180	0.06	77	489	0.21	0.74	2	0.637
NV22336-3		180	1.94	119	264	0.42	0	3	0.724
NV22336-2		180	1.96	112	877	0.38	0	3	0.105
NV22336-1		180	1.9	116	1287	0.49	0	3	0.359
NV22305-1		180	1.78	99	604	0.56	0	4	0.618
NV22272-1	mRpL35 (mitochondrial ribosomal protein L35)	180	0.19	61	40	0.62	0	3	0.511
NV21988-1	chif (chiffon)	180	0.13	59	746	0.59	1.32	2	0.621
NV21980-1		180	0.99	121	1528	0.34	1.86	2	0.232
NV21977-1	CG3407	180	0.13	70	1268	0.53	1.16	3	0.214
NV21669-1	CG9650	180	0.59	71	637	0.69	2.26	2	0.833
NV21566-1	MED26 (Mediator complex subunit 26)	180	1	117	91	0.66	1.5	3	0.876
NV21238-1		180	0.41	64	1718	0.38	0	2	0.333
NV21223-1	CG17549	180	0.06	51	156	0.49	2.29	2	0.885
NV21018-1		180	0.06	53	935	0.52	1.39	2	0.089
NV20877-1	CG43386	180	0.76	99	840	0.6	0	2	0.242
NV20647-1	CG3764	180	0.06	52	204	0.54	1.67	2	0.254
NV20227-1		180	0.09	55	1142	0.33	1.36	3	1
NV20185-1		180	0.09	61	1616	0.59	0	3	0.46
NV20053-1		180	0.24	64	175	0.55	0	2	0.869
NV19234-1	bab1 (bric a brac 1)	180	0.72	102	1006	0.38	0.54	4	0.523
NV18924-1	Ubqn (Ubiquilin)	180	0.41	58	1	0.4	0	2	0.975
NV18787-1	bs (blistered)	180	0.26	68	781	0.38	1.97	3	0.067
NV18562-1	Hrb27C (Heterogeneous nuclear ribonucleoprotein at 27C)	180	0.13	56	1	0.38	0.8	3	0.001
NV18474-1		180	0.87	154	341	0.41	1.13	2	0.377
NV18402-1	Tollo (Tollo)	180	0.14	61	694	0.51	0	3	0.005
NV18378-1	ple (pale)	180	0.37	91	367	0.67	0	3	0.654
NV18209-1	vfl (vielfaltig)	180	0.41	62	925	0.66	0	2	0.522
NV18067-1	CG30394	180	0.07	65	1406	0.14	1.14	2	0.06
NV18065-1	CG11658	180	0.41	73	448	0.62	4.08	2	0.025
NV18060-1	Pph13 (PvuII-PstI homology 13)	180	1.45	93	280	0.41	0	4	0.433
NV18042-1	Scgdelta (Sarcoglycan delta)	180	0.41	81	140	0.51	0.96	2	0.162
NV17890-1	CG13287	180	0.12	63	684	0.52	2.36	4	0.105
NV17888-1	vn (vein)	180	2.71	132	1358	0.77	0	4	0.531
NV17858-2	Su(H) (Suppressor of Hairless)	180	0.14	64	414	0.41	3.6	4	0.534
NV17858-1	Su(H) (Suppressor of Hairless)	180	0.41	67	1879	0.46	0.72	2	0.22
NV17836-1	CG11399	180	0.19	61	500	0.41	1.56	3	0.652
NV17822-1		180	0.41	87	1645	0.31	0.67	2	0.048
NV17759-2	run (runt)	180	2.71	97	235	0.62	1.22	4	0.867
NV17759-1	run (runt)	180	2.28	89	371	0.76	0	4	0.659
NV17751-1	CG31612	180	2.92	97	1330	0.68	0	4	0.417
NV17743-2	esg (escargot)	180	0.49	153	331	0.69	0	4	0.063
NV17743-1	esg (escargot)	180	2.73	98	686	0.64	1.88	4	0.466
NV17606-1	CG15309 (Protein yippee-like )	180	1.97	90	218	0.6	0	3	0.505
NV17527-1	CG8726	180	0.13	62	75	0.6	4.61	3	0.157
NV17452-1	jp (junctophilin)	180	0.41	64	1840	0.58	1.13	2	0.647
NV17427-1	CG6321	180	0.17	56	1915	0.25	0	2	0.464
NV17418-1	ato (atonal)	180	1.92	88	1269	0.51	0.77	3	0.061
NV17391-1	Prm (Paramyosin)	180	2.99	134	331	0.66	1.73	4	< 0.001
NV17376-1		180	0.59	136	360	0.46	0.67	2	0.853
NV17330-1	Dr (Drop)	180	0.3	66	618	0.53	1.04	4	0.74
NV17325-1	C15 (C15)	180	0.48	88	487	0.55	1.4	3	0.523
NV17324-1	Crz (Corazonin)	180	2.23	82	1537	0.54	0.92	4	0.06
NV17286-2	fru (fruitless)	180	0.14	51	1	0.41	0	3	0.651
NV17286-1	fru (fruitless)	180	1.74	93	1540	0.6	0.87	3	0.264
NV17281-1	CG14304	180	0.13	70	1450	0.5	1.04	2	0.555
NV17223-1	rno (rhinoceros)	180	0.42	77	415	0.38	1.41	3	0.205
NV17221-1	Abl (Abl tyrosine kinase)	180	0.06	52	810	0.52	0	2	0.608
NV17203-1	klu (klumpfuss)	180	0.41	55	1	0.75	2.72	2	0.264
NV17168-1	Taf4 (TBP-associated factor 4)	180	0.06	50	1	0.62	1.74	3	0.689
NV17128-1	croc (crocodile)	180	0.94	90	1624	0.56	0.84	2	0.393
NV17083-1	Nat1 (Nat1)	180	1.92	129	1	0.42	0	3	0.136
NV17082-1	CG12267	180	0.99	130	829	0.42	0.55	2	0.212
NV16881-1	CG12164	180	0.37	57	76	0.54	0	3	0.54
NV16829-2	CG17737	180	0.3	56	1	0.44	0	3	0.041
NV16829-1	CG17737	180	1.18	84	401	0.61	1.49	3	0.584
NV16828-1	Gap69C (GTPase-activating protein 69C)	180	0.24	64	874	0.56	0.91	2	0.787
NV16812-1	Best2 (Bestrophin 2)	180	0.13	61	1482	0.66	0	2	0.471
NV16713-1	Adk3 (Adenylate kinase-3)	180	0.94	82	284	0.3	1.23	2	0.04
NV16656-1	Nipped-B (Nipped-B)	180	0.59	73	631	0.51	0.84	2	0.202
NV16639-1	Snx6 (Snx6)	180	1.06	75	59	0.57	1.74	4	0.047
NV16613-2	Act5C (Actin 5C)	180	0.06	54	870	0.72	0	2	0.748
NV16613-1	Act5C (Actin 5C)	180	1.36	79	1922	0.53	0.82	3	0.077
NV16554-1	Jra (Jun-related antigen)	180	0.09	68	507	0.52	0	4	0.133
NV16549-1	Sox21b (Sox21b)	180	0.52	76	1479	0.41	0.6	2	0.264
NV16536-1	verm (vermiform)	180	0.67	86	7	0.62	0	2	0.046
NV16535-1	serp (serpentine)	180	0.09	56	247	0.61	0	4	0.657
NV16506-1	PRL-1 (PRL-1)	180	0.08	59	355	0.46	1.08	3	1
NV16455-1	Synd (Syndapin)	180	0.13	77	257	0.52	0.91	3	0.165
NV16368-1	m (miniature)	180	0.76	77	767	0.65	1.44	2	0.227
NV16367-1	dy (dusky)	180	0.13	70	456	0.64	0	2	0.242
NV16358-1	resilin (resilin)	180	0.06	56	222	0.5	1.39	3	1
NV16211-1	CG17856 (Cytochrome b-c1 complex subunit 7 )	180	0.99	142	904	0.44	1	2	0.058
NV16179-1	Hmgs (HMG Coenzyme A synthase)	180	0.09	55	251	0.52	0	3	0.001
NV16160-1	Npc1a (Niemann-Pick type C-1a)	180	1.11	82	1293	0.38	1.67	3	0.322
NV16152-1	CG17687	180	0.97	176	1183	0.54	0.45	2	0.36
NV16142-1	fd59A (forkhead domain 59A)	180	0.2	67	55	0.42	0	4	0.515
NV16114-1	l(2)35Di (lethal (2) 35Di)	180	0.97	121	1118	0.38	1.03	2	0.551
NV16100-1	flfl (falafel)	180	0.48	65	1897	0.49	0.79	3	0.515
NV16069-1		180	0.76	89	162	0.49	0.89	2	0.445
NV15980-1		180	0.94	99	1	0.46	1.71	2	0.848
NV15946-1	RpS20 (Ribosomal protein S20)	180	0.06	55	16	0.36	0	2	0.076
NV15937-1	Gyk (Glycerol kinase)	180	0.13	55	900	0.51	1.08	2	0.202
NV15936-1		180	0.13	55	705	0.51	0	2	0.66
NV15911-1		180	0.06	54	188	0.41	0.99	2	0.366
NV15836-1	Gycalpha99B (Guanylyl cyclase alpha-subunit at 99B)	180	0.13	63	791	0.66	2.09	2	0.27
NV15821-1		180	0.3	61	1	0.48	0	3	0.24
NV15799-1	bru (brunelleschi)	180	0.26	56	2	0.45	1.16	3	0.287
NV15785-1	erm (earmuff)	180	0.59	83	877	0.51	0	2	0.453
NV15776-1	CG4702	180	0.27	73	1920	0.65	0	3	0.547
NV15774-1	CG12214	180	0.19	73	1683	0.53	0	3	0.789
NV15766-1	eIF5 (eIF5)	180	0.19	72	1554	0.55	0	3	0.047
NV15758-1		180	1.64	81	302	0.32	0	3	0.887
NV15651-1	CG5731	180	0.49	74	500	0.57	1.7	3	0.224
NV15601-1	lva (lava lamp)	180	0.41	118	94	0.42	0	2	0.305
NV15590-1		180	0.13	57	1522	0.46	0	2	0.229
NV15586-1	CG33993	180	0.37	56	1768	0.54	1.48	3	0.65
NV15578-2	Task6 (Task6)	180	0.76	72	1	0.6	1.95	2	0.724
NV15578-1	Task6 (Task6)	180	0.06	55	368	0.61	1.61	2	0.304
NV15553-1	CG5850	180	0.19	70	1924	0.53	2.19	4	0.288
NV15425-1		180	0.25	59	744	0.18	2.48	3	0.373
NV15321-1	CG34449	180	0.06	50	119	0.54	3.29	3	0.985
NV15185-1	Tctp (Translationally controlled tumor protein)	180	0.6	87	1	0.41	0	4	0.22
NV15143-3	Ubx (Ultrabithorax)	180	0.79	80	325	0.57	0	4	0.595
NV15143-2	Ubx (Ultrabithorax)	180	2.91	98	831	0.61	0	4	0.203
NV15143-1	Ubx (Ultrabithorax)	180	1.94	90	1670	0.57	0	3	0.169
NV15142-1	Abd-B (Abdominal B)	180	0.09	56	1577	0.55	0	3	0.25
NV15108-2	pros (prospero)	180	2.96	86	1	0.73	2.1	4	0.022
NV15108-1	pros (prospero)	180	1.96	116	679	0.66	0.83	3	0.203
NV15028-1	CG13868	180	0.56	71	350	0.46	0.76	4	0.734
NV15008-2	dpn (deadpan)	180	0.41	79	295	0.6	3.14	2	0.936
NV15008-1	dpn (deadpan)	180	0.13	62	451	0.69	0	2	0.89
NV15002-1	br (broad)	180	0.57	73	1786	0.35	0	2	0.71
NV14998-1	loqs (loquacious)	180	2.97	148	1080	0.49	0	4	0.002
NV14997-1	tra2 (transformer 2)	180	1	116	903	0.47	0.6	2	0.201
NV14982-2	NAT1 (NAT1)	180	2	159	160	0.56	0	3	0.058
NV14982-1	NAT1 (NAT1)	180	0.38	62	849	0.62	1.59	4	0.668
NV14975-1	na (narrow abdomen)	180	0.06	50	1	0.36	2.71	2	0.595
NV14934-1		180	1.94	142	1	0.59	0.94	3	0.66
NV14899-1	CG13296	180	0.48	67	1336	0.46	0.94	3	0.695
NV14868-1	slbo (slow border cells)	180	1.95	89	414	0.66	1.24	4	0.146
NV14848-1	Ef2b (Elongation factor 2b)	180	2.46	113	284	0.54	0.69	4	0.331
NV14825-1	Cpr49Ah (Cuticular protein 49Ah)	180	0.37	66	185	0.53	0	3	0.12
NV14756-2	CG5435	180	0.38	73	637	0.51	1.09	4	0.425
NV14756-1	CG5435	180	0.25	63	1700	0.6	0	2	0.178
NV14652-1		180	1.1	141	1	0.62	0.69	3	0.242
NV14570-1	CG14127	180	0.09	54	500	0.49	1.69	3	0.396
NV14554-1	CG15100	180	0.19	77	10	0.36	0.92	3	0.562
NV14485-1	CG7497	180	0.06	50	492	0.62	0	2	0.875
NV14480-2	Hr51 (Hormone receptor 51)	180	0.13	55	432	0.67	0	2	0.352
NV14480-1	Hr51 (Hormone receptor 51)	180	0.76	96	1346	0.66	1.08	2	0.855
NV14442-2		180	2.12	102	266	0.54	1.07	4	0.527
NV14442-1		180	0.82	137	851	0.48	1.52	3	0.94
NV14372-1	Spred (Sprouty-related protein with EVH-1 domain)	180	0.66	84	23	0.52	2.17	3	0.369
NV14356-2	ran (ran)	180	0.76	75	1293	0.55	1.22	2	0.749
NV14251-1	Pkc53E (Protein C kinase 53E)	180	0.24	61	527	0.67	1.49	2	0.869
NV14215-1	CG5708	180	0.13	54	1	0.78	0	2	0.87
NV14212-2		180	1.63	73	167	0.46	0.8	3	0.738
NV14212-1		180	0.99	102	537	0.42	0	2	0.177
NV14110-1	CG2519	180	0.41	74	20	0.59	2.83	2	0.36
NV13978-1	CG8223	180	0.06	61	1938	0.69	0	2	0.396
NV13906-1	CG18809	180	0.08	68	27	0.38	0	3	0.282
NV13823-1	ksr (kinase suppressor of ras)	180	0.08	60	457	0.53	1.91	4	0.167
NV13765-1	CG12125	180	0.76	70	1931	0.57	0	2	0.406
NV13753-1	l(2)NC136 (lethal (2) NC136)	180	2.92	189	1	0.44	0.7	4	0.273
NV13728-1	hdc (headcase)	180	0.24	98	542	0.6	1.21	2	0.272
NV13585-1	CG14314	180	0.41	65	320	0.35	2.47	2	0.006
NV13511-1	CG3168	180	0.05	50	192	0.6	0	3	0.131
NV13501-1	CG5819	180	1	139	717	0.54	0.92	3	0.025
NV13479-1	P58IPK (P58IPK)	180	0.3	87	909	0.38	0	3	0.177
NV13437-1	ex (expanded)	180	1.47	60	1	0.52	1.97	3	0.962
NV13415-1	dac (dachshund)	180	0.38	72	491	0.46	0	4	0.032
NV13401-1		180	0.16	58	319	0.42	2.78	3	1
NV13348-1	sesB (stress-sensitive B)	180	0.41	76	58	0.67	0	2	0.938
NV13312-1	ara (araucan)	180	0.5	75	538	0.63	0	2	0.407
NV13224-2	MBD-like (MBD-like)	180	1.74	96	840	0.36	1.74	3	0.057
NV13224-1	MBD-like (MBD-like)	180	0.76	76	1213	0.36	1.25	2	0.774
NV13195-1	ctrip (circadian trip)	180	0.27	52	1	0.33	0.94	3	0.362
NV13182-1	Ef1alpha48D (Elongation factor 1alpha48D)	180	0.41	78	1564	0.59	2.5	2	0.173
NV13065-1	Gug (Grunge)	180	1.63	80	1	0.55	0	3	0.57
NV12919-1	Hdc (Histidine decarboxylase)	180	0.06	57	440	0.45	2.64	2	0.667
NV12891-1		180	0.13	65	1239	0.66	2.77	2	0.14
NV12885-1	Dll (Distal-less)	180	2.92	102	1085	0.64	0.83	4	0.621
NV12835-1	eIF-5A (eIF-5A)	180	0.97	91	1113	0.51	0.76	2	0.512
NV12775-2	COQ7 (COQ7)	180	0.87	240	216	0.46	1.98	2	0.747
NV12775-1	COQ7 (COQ7)	180	0.61	127	711	0.28	0.53	3	0.108
NV12766-1	CG34367	180	2.74	97	1469	0.53	0	4	0.174
NV12678-1	CG33521	180	0.59	75	1618	0.53	1.04	2	0.503
NV12643-1	Osi20 (Osiris 20)	180	1.92	180	79	0.54	0.39	3	0.819
NV12639-1	Osi16 (Osiris 16)	180	1.65	79	252	0.44	0	4	0.249
NV12636-1	Osi12 (Osiris 12)	180	0.09	53	432	0.63	1.42	3	0.569
NV12635-1	Osi9 (Osiris 9)	180	2.91	136	131	0.53	0	4	0.354
NV12634-1	Osi8 (Osiris 8)	180	1.47	85	798	0.51	0	3	0.292
NV12633-1	Osi7 (Osiris 7)	180	1	73	196	0.51	0	3	0.844
NV12623-1	slou (slouch)	180	0.24	70	1388	0.59	1.11	2	0.302
NV12576-1		180	0.19	67	99	0.67	0	3	0.891
NV12561-3	noc (no ocelli)	180	2.96	133	466	0.59	1.77	4	0.208
NV12561-2	noc (no ocelli)	180	1.36	173	649	0.53	0.71	3	0.367
NV12561-1	noc (no ocelli)	180	1.19	93	919	0.48	0	3	0.428
NV12451-1	Hsc70-3 (Heat shock protein cognate 3)	180	0.06	50	896	0.64	0	3	0.393
NV12377-1	Optix (Optix)	180	2.91	135	675	0.6	1.36	4	0.002
NV12328-1	LSm7	180	0.1	58	191	0.2	1.32	3	1
NV12312-1	crc (cryptocephal)	180	0.32	67	40	0.51	1.43	4	0.322
NV12308-1	CG1677	180	0.06	52	583	0.54	2.15	2	0.504
NV12189-1	bowl (brother of odd with entrails limited)	180	0.19	63	1043	0.61	1.25	3	0.402
NV12182-1	chico (chico)	180	0.87	112	1410	0.59	1.96	2	0.921
NV12179-1	CG34340	180	0.59	77	811	0.42	0	2	0.89
NV12155-1	CG42450	180	1.19	50	1	0.66	0	3	0.206
NV12116-1	bsh (brain-specific homeobox)	180	0.13	61	650	0.5	1.04	2	0.059
NV12093-1	Maf1	180	0.08	96	188	0.28	0.58	3	0.18
NV12083-1	Pfk (Phosphofructokinase)	180	1	85	1510	0.26	0.94	2	0.326
NV12029-1	CG3409	180	0.08	51	78	0.64	0	3	0.426
NV11988-1	Apf (diadenosine tetraphosphate hydrolase)	180	0.59	130	631	0.35	0.81	2	0.333
NV11914-1	Rh5 (Rhodopsin 5)	180	0.61	69	268	0.56	0	3	0.051
NV11898-1	CG9630	180	0.72	69	401	0.3	0	3	0.216
NV11864-3	CG6340	180	0.87	73	1	0.27	0.71	2	0.046
NV11864-2	CG6340	180	0.24	67	362	0.48	2.43	2	0.095
NV11864-1	CG6340	180	0.24	82	970	0.51	2.69	2	0.155
NV11815-1	tap (target of Poxn)	180	0.06	60	813	0.4	0	3	0.592
NV11808-2	mip120 (Myb-interacting protein 120)	180	0.08	51	466	0.59	4.92	4	0.081
NV11808-1	mip120 (Myb-interacting protein 120)	180	0.25	63	951	0.45	0.95	4	0.989
NV11755-1	ana3 (anastral spindle 3)	180	0.13	75	1285	0.24	1.99	3	0.257
NV11751-1	CG40045	180	1.19	99	1	0.38	0	3	0.885
NV11744-3		180	1	79	157	0.47	1.65	3	0.479
NV11744-2		180	0.37	73	685	0.48	0.8	3	0.686
NV11744-1		180	0.06	55	857	0.44	0	3	0.022
NV11696-2	Eip74EF (Ecdysone-induced protein 74EF)	180	0.94	147	1	0.67	1.59	2	0.497
NV11696-1	Eip74EF (Ecdysone-induced protein 74EF)	180	0.13	57	398	0.55	0	2	0.498
NV11695-1	CG33635	180	0.97	94	232	0.29	2.02	2	0.589
NV11625-1	sug (sugarbabe)	180	0.94	120	264	0.51	0.67	2	0.409
NV11605-1	faf (fat facets)	180	0.38	73	89	0.3	0.7	4	0.338
NV11589-1	fkh (fork head)	180	0.27	89	290	0.7	0	4	0.256
NV11535-1	Neurochondrin (Neurochondrin)	180	0.11	57	1842	0.54	0	4	0.404
NV11534-1	CG15771	180	1.84	165	557	0.39	1.26	3	0.054
NV11516-1	CG7816	180	0.59	59	591	0.68	0	2	0.127
NV11451-1	opa (odd paired)	180	0.13	72	266	0.68	0	2	0.327
NV11435-1	CG11030	180	2.81	149	1	0.38	0.35	4	0.175
NV11429-1	qua (quail)	180	0.41	60	1750	0.77	0	2	0.748
NV11350-1	CG32354	180	0.41	127	357	0.61	0	2	0.02
NV11300-1	CAH1 (Carbonic anhydrase 1)	180	0.13	65	12	0.52	0	2	0.779
NV11250-1	CG11857	180	0.08	53	770	0.26	1.72	2	0.081
NV11211-2	CG12099	180	0.41	83	138	0.47	1.82	2	0.071
NV11211-1	CG12099	180	0.06	63	640	0.51	0	2	0.173
NV11200-3	Vps20 (Vacuolar protein sorting 20)	180	2	117	493	0.26	1.17	3	0.359
NV11200-2	Vps20 (Vacuolar protein sorting 20)	180	1.77	142	799	0.28	1.52	3	0.507
NV11200-1	Vps20 (Vacuolar protein sorting 20)	180	0.76	145	1783	0.27	1.69	2	0.86
NV11144-1	sws (swiss cheese)	180	0.31	63	253	0.52	3.46	3	0.514
NV11125-2	Odc1 (Ornithine decarboxylase 1)	180	0.05	50	50	0.36	0	2	0.544
NV11125-1	Odc1 (Ornithine decarboxylase 1)	180	0.09	50	349	0.46	0	4	0.876
NV11108-1	CG1461	180	1.17	70	331	0.53	0	3	0.581
NV11088-1	EcR (Ecdysone receptor)	180	0.94	92	152	0.71	1.2	2	0.677
NV11069-1	Ca-P60A (Calcium ATPase at 60A)	180	0.59	67	1804	0.42	0	2	0.901
NV11030-1	Opbp (Optix-binding protein)	180	1.87	78	324	0.46	0.91	4	0.729
NV11000-1	RunxA	180	0.61	73	1321	0.52	0.9	4	0.037
NV10998-2	RunxB	180	0.13	59	770	0.49	0	2	0.284
NV10998-1	RunxB	180	0.87	102	1229	0.7	0	2	0.804
NV10971-1	CG8420	180	0.24	61	1600	0.58	1.22	2	0.754
NV10929-1	Mlc2 (Myosin light chain 2)	180	0.76	88	36	0.47	0.82	2	0.513
NV10916-1		180	0.09	51	1080	0.51	1.35	3	0.985
NV10882-1	(Integrin beta )	180	0.25	66	43	0.57	1.21	3	0.173
NV10873-3	(Homeobox protein engrailed )	180	1.94	110	173	0.55	0.82	3	0.568
NV10873-2	(Homeobox protein engrailed )	180	0.06	61	359	0.57	0	3	0.029
NV10873-1	(Homeobox protein engrailed )	180	0.64	67	1157	0.46	0.84	3	0.233
NV10872-1	en (engrailed)	180	0.06	52	559	0.73	0	4	0.117
NV10749-1	CG5195	180	0.09	51	1528	0.61	0	3	0.176
NV10738-1	CG2150	180	0.11	55	19	0.53	0	4	0.669
NV10700-1	Usf (Usf)	180	2.89	98	13	0.54	0.97	4	0.43
NV10664-2	CG8080	180	2	149	616	0.3	1.21	3	0.473
NV10664-1	CG8080	180	0.76	95	856	0.23	1.78	2	0.687
NV10645-1	CG13667	180	0.06	50	1339	0.46	0	3	0.852
NV10642-1	B52 (B52)	180	1.59	65	1	0.34	1.37	4	0.063
NV10633-1	Ino80 (Ino80)	180	1.95	103	553	0.56	4.51	4	0.237
NV10632-1	CtBP (C-terminal Binding Protein)	180	0.38	65	168	0.57	1.17	4	0.302
NV10623-1	ab (abrupt)	180	1.19	92	1287	0.36	0.7	3	0.477
NV10602-1	CG6415 (Aminomethyltransferase )	180	1.07	88	1345	0.38	0	4	0.262
NV10568-1	HGTX (HGTX)	180	0.99	130	160	0.51	0.57	2	0.763
NV10354-1	yps (ypsilon schachtel)	180	0.76	71	123	0.56	0	2	0.559
NV10310-1		180	0.13	79	604	0.41	1.69	2	0.595
NV10247-1	CG5768	180	0.24	65	762	0.43	0	2	0.664
NV10246-1	nAcRalpha-96Aa (nicotinic Acetylcholine Receptor alpha 96Aa)	180	0.59	117	1	0.58	1.93	2	0.815
NV10220-3	Unr (Upstream of N-ras)	180	2.87	188	150	0.32	0.28	4	0.309
NV10200-1	moody (moody)	180	0.59	83	1637	0.48	1.02	2	0.04
NV10189-1	Tip60 (Tip60)	180	0.24	105	1399	0.57	0	2	0.668
NV10037-1	ft (fat)	180	0.41	60	1512	0.58	2.27	2	0.746

## Sheet: Table S5
Organism	Total annotated genes	No. genes with RBH	% annotated genes with RBH
Nasonia vitripennis (total)	19850	10624	0.5352
Acyrthosiphon pisum	36939	6623	0.1793
Aedes aegypti	17391	6738	0.3874
Apis mellifera	10675	7434	0.6964
Atta cephalotes	18534	8008	0.4321
Bombyx mori	14623	6472	0.4426
Danaus plexippus	16260	6842	0.4208
Dendroctonus ponderosae	13407	6426	0.4793
Drosophila melanogaster	15682	6760	0.4311
Heliconius melpomene	16203	6325	0.3904
Megaselia scalaris	11784	4262	0.3617
Solenopsis invicta	17377	7249	0.4172
Tribolium castaneum	16541	7091	0.4287

## Sheet: Table S6
Set	No. CNEs (pre-filtering)	Significance (E-value) threshold	No. CNEs (post-filtering)
CNE candidates	383	0.096	334
Pseudo-CNEs	382	0.049	359

## Sheet: Table S7
Upstream sequence	Identity (%)	Length	E-value
atta_cephalotes_ACEP10610|ACEP10610-RA	97.4	77	3e-37
solenopsis_invicta_SINV10644|SINV10644-RA	97.4	77	3e-37
apis_mellifera_GB18988|GB18988-RA	94.67	75	3e-32
Nasonia_vitripennis|NV18106|NV18106-RA	90.91	77	6e-29
rhodnius_prolixus_RPRC005691|RPRC005691-RA	94.03	67	8e-28
tribolium_castaneum_TCOGS2:TC003500|TCOGS2:TC003500-RA	88.52	61	5e-20
heliconius_melpomene_HMEL007237|HMEL007237-RA	89.8	49	1e-16
danaus_plexippus_KGM_03919|EHJ78318	87.76	49	5e-15
Strigamia_maritima_SMAR004204|SMAR004204-RA	88	50	5e-15
atta_cephalotes_ACEP10610|ACEP10610-RA	96.43	28	1e-11
solenopsis_invicta_SINV10644|SINV10644-RA	96.43	28	1e-11
apis_mellifera_GB18988|GB18988-RA	96.43	28	1e-11
Acyrthosiphon_pisum_ACYPI067726|ACYPI067726-RA	82.69	52	4e-11
rhodnius_prolixus_RPRC005691|RPRC005691-RA	92.86	28	5e-10
heliconius_melpomene_HMEL007237|HMEL007237-RA	92.86	28	5e-10
danaus_plexippus_KGM_03919|EHJ78318	92.86	28	5e-10
Euphausia_superba	82	50	5e-10
Acyrthosiphon_pisum_ACYPI000441|ACYPI000441-RA	93.1	29	2e-09
Nasonia_vitripennis|NV18106|NV18106-RA	92.86	28	2e-09
Euphausia_superba	89.66	29	8e-08
tribolium_castaneum_TCOGS2:TC003500|TCOGS2:TC003500-RA	85.71	28	1e-06
Acyrthosiphon_pisum_ACYPI067726|ACYPI067726-RA	85.71	28	4e-06
Strigamia_maritima_SMAR004204|SMAR004204-RA	84.62	26	1e-05
pediculus_humanus_PHUM564470|PHUM564470-RA	100	13	0.0002
daphnia_pulex_DAPPUDRAFT_324499|EFX74246	100	12	0.0006
daphnia_pulex_DAPPUDRAFT_324499|EFX74246	100	12	0.0006

## Sheet: Table S8
Organism	Gene identifier
Acyrthosiphon pisum	ACYPI000441
Acyrthosiphon pisum	ACYPI067726
Aedes aegypti	AAEL007326
Aedes aegypti	AAEL013767
Amphimedon queenslandica	Aqu1.229996
Anopheles darlingi	ADAR005399
Anopheles gambiae	AGAP009057
Apis mellifera	GB18988
Atta cephalotes	ACEP10610
Bombyx mori	BGIBMGA012230
Brugia malayi	Bm4512
Caenorhabditis brenneri	CBN01277
Caenorhabditis briggsae	CBG16483
Caenorhabditis elegans	WBGene00002845
Caenorhabditis japonica	CJA32020
Caenorhabditis remanei	CRE20280
Caenorhabditis remanei	CRE20281
Capitella teleta	CapteG157774
Crassostrea gigas	CGI_10028250
Crassostrea gigas	CGI_10023793
Culex quinquefasciatus	CPIJ007821
Danaus plexippus	KGM_03919
Daphnia pulex	DAPPUDRAFT_324499
Daphnia pulex	DAPPUDRAFT_117361
Daphnia pulex	DAPPUDRAFT_244230
Dendroctonus ponderosae	YQE_03828
Drosophila ananassae	FBgn0089535
Drosophila erecta	FBgn0117400
Drosophila grimshawi	FBgn0129420
Drosophila melanogaster	FBgn0085436
Drosophila mojavensis	FBgn0142403
Drosophila persimilis	FBgn0154914
Drosophila persimilis	FBgn0154915
Drosophila pseudoobscura	FBgn0264582
Drosophila sechellia	FBgn0175479
Drosophila simulans	FBgn0181845
Drosophila virilis	FBgn0202229
Drosophila willistoni	FBgn0223484
Drosophila yakuba	FBgn0239473
Euphausia superba	N/A
Heliconius melpomene	HMEL007237
Helobdella robusta	HelroG157038
Ixodes scapularis	ISCW022114
Loa loa	LOAG_17788
Lottia gigantea	LotgiG239532
Megaselia scalaris	MESCA003458
Nasonia vitripennis	NV18106
Nematostella vectensis	NEMVEDRAFT_v1g90783
Onchocerca volvulus	WBGene00245503
Pediculus humanus	PHUM564470
Pristionchus pacificus	PPA15398
Rhodnius prolixus	RPRC005691
Schistosoma mansoni	Smp_133320
Solenopsis invicta	SINV10644
Strigamia maritima	SMAR004204
Strongylocentrotus purpuratus	SPU_028421
Tetranychus urticae	tetur10g04580
Tribolium castaneum	TCOGS2:TC003500
Trichinella spiralis	EFV52447
Trichoplax adhaerens	TriadG23606

## Sheet: Table S9
Abbreviation	Meaning
Nvi	Nasonia vitripennis
Ame	Apis mellifera
Sin	Solenopsis invicta
Ace	Atta cephalotes
Dme	Drosophila melanogaster
Aae	Aedes aegypti
Msc	Megaselia scalaris
Bmo	Bombyx mori
Dpl	Danaus plexippus
Hme	Heliconius melpomene
Tca	Tribolium castaneum
Api	Acyrthosiphon pisum
Phu	Pediculus humanus
Dpu	Daphnia pulex
Sma	Strigamia maritima
Isc	Ixodes scapularis
Cel	Caenorhabditis elegans
Llo	Loa loa
Lgi	Lottia gigantea
Cgi	Crassostrea gigas
Cte	Capitella teleta
Hro	Helobdella robusta
Itr	Ictidomys tridecemlineatus
Hsa	Homo sapiens
Ttr	Tursiops truncatus
Ame*	Ailuropoda melanoleuca
Mga	Meleagris gallopavo
Fal	Ficedula albicollis
Gac	Gasterosteus aculeatus
Xtr	Xenopus tropicalis
Tru	Takifugu rubripes
Tni	Tetraodon nigroviridis
Spu	Strongylocentrotus purpuratus
Nve	Nematostella vectensis
Tad	Trichoplax adhaerens
Dpo	Dendroctonus ponderosae
Rpr	Rhodnius prolixus
Mle	Mnemiopsis leidyi
Aqu	Amphimedon queenslandica
Aqu*	Amphimedon queenslandica putative RPLP1 paralog
